# Supplementary material for: Interphysician agreement on subclassification of myocardial infarction
Source: PubMed Central journal article supplement — Heart. 2018 Feb 16;104(15):1284–91. doi: 10.1136/heartjnl-2017-312409 (PMC6204971; doi:10.1136/heartjnl-2017-312409), 2018-02-16
Supplement: heartjnl-2017-312409supp001.pdf [file heartjnl-2017-312409supp001.pdf]

## **Supplemental file. Definition of myocardial infarction and myocardial injury subtypes.**

MI was defined as myocardial necrosis caused by acute ischemia and diagnosed if there was evidence of myocardial necrosis, in form of elevated cTn with a rising or falling pattern, in a clinical setting of acute myocardial ischemia, such as ischemic symptoms, ischemic ECG findings, imaging evidence of new loss of viable myocardium or identification of an intracoronary thrombus.

Type 1 MI was defined as MI caused by a verified or highly suspected coronary artery plaque rupture, ulceration, fissuring or dissection resulting in an intracoronary thrombus formation.

Type 2 MI was defined as MI without intracoronary thrombus formation where conditions other than atherosclerotic CAD contributed to a cardiac oxygen supply/demand imbalance. The following conditions alone or together were accepted as potential triggering mechanisms (no specified cut off levels other than those presented in *the Third Universal Definition of MI* where used):

- Tachyarrhythmia
- Bradyarrhythmia
- Aortic dissection
- Severe aortic stenosis or insufficiency
- Shock (cardiogenic, hypovolemic or septic)
- Respiratory failure
- Severe anemia
- Hypertension with or without left ventricular hypertrophy
- Coronary spasm, endothelial dysfunction or embolism or vasculitis

Multifactorial myocardial injury was defined as evidence of myocardial necrosis in form of elevated cTn with or without a rising or falling pattern and *without* clear clinical evidence of ischemia (such as ischemic symptoms, ischemic ECG findings or imaging/autopsy findings supporting ischemic necrosis). The following conditions alone or together were accepted as potentially causing a multifactorial myocardial injury:

- Heart failure
- Takotsubo cardiomyopathy
- Severe pulmonary embolism or pulmonary hypertension
- Sepsis (not septic shock) or critically ill patients
- Renal failure
- Severe acute neurological diseases, e.g. stroke or subarachnoid hemorrhage
- Infiltrative diseases, e.g. amyloidosis or sarcoidosis
- Strenuous exercise

In addition, some patients, presenting with typical ischemic symptoms or ECG-changes, without an underlying provoking condition, and where the

cTn concentrations were only slightly elevated without a rising or falling pattern, were classified as unstable angina and categorized as multifactorial myocardial injury.

Non-ischemic myocardial injury was defined as evidence of myocardial necrosis in form of elevated cTn with or without a rising or falling pattern and *without* clear clinical evidence of ischemia (such as ischemic symptoms, ischemic ECG findings or imaging/autopsy findings supporting ischemic necrosis). The following conditions alone or together were accepted as potentially causing a non-ischemic myocardial injury:

- Cardiac contusion, surgery, ablation, pacing, or defibrillator shocks
- Rhabdomyolysis with cardiac engagement
- Myocarditis
- Cardiotoxic agents, e.g. anthracyclines or Herceptin
