# Supplementary material for: Interphysician agreement on subclassification of myocardial infarction
Source: PubMed Central journal article supplement — Heart. 2018 Feb 16;104(15):1284–91. doi: 10.1136/heartjnl-2017-312409 (PMC6204971; doi:10.1136/heartjnl-2017-312409), 2018-02-16
Supplement: heartjnl-2017-312409supp002.pdf [file heartjnl-2017-312409supp002.pdf]

**Supplementary table 1.** List of variables with a significant difference between cases of agreement and cases of disagreement in a univariate model and inclusion in the multivariate logistic regression model.

| Variable                               | <i>p</i> | Valid cases      | Inclusion |
|----------------------------------------|----------|------------------|-----------|
| Chest X-ray performed, yes/no          | <0.001   | All              | Yes       |
| CT thorax performed, yes/no            | <0.001   | All, only 93 yes | No        |
| ST-elevation MI, yes/no                | <0.001   | All              | Yes       |
| Heart rate                             | <0.001   | 1262             | Yes       |
| Coronary angiography performed, yes/no | <0.001   | All              | Yes       |
| Respiratory rate                       | <0.001   | 886              | No        |
| Oxygen saturation                      | <0.001   | 1027             | Yes       |
| LDL cholesterole                       | <0.001   | 639              | No        |
| cTn maximum level                      | <0.001   | 1301             | Yes       |
| cTn dynamics                           | <0.001   | 1153             | Yes       |
| CRP on damission                       | <0.001   | 1283             | Yes       |
| CRP maximum level                      | <0.001   | 1284             | Yes       |
| Hemoglobin                             | <0.001   | 1299             | Yes       |
| Registered in SWEDEHEART, yes/no       | <0.001   | All              | Yes       |
| Cardiology department, yes/no          | <0.001   | All              | Yes       |
| Chest pain, yes/no                     | <0.001   | All              | Yes       |
| Ongoing chest pain, yes/no             | <0.001   | All              | Yes       |
| Dyspnea, yes/no                        | <0.001   | All              | Yes       |
| Prior stroke or TIA, yes/no            | <0.001   | All              | Yes       |
| Active smoker, yes/no                  | <0.001   | All              | Yes       |
| Age, years                             | <0.001   | All              | Yes       |
| non-cardiac related symptoms*, yes/no  | 0.001    | All              | Yes       |
| Systolic blood pressure                | 0.001    | 1261             | Yes       |
| Dementia, yes/no                       | 0.002    | All              | Yes       |
| Creatinine on admission                | 0.002    | 1306             | Yes       |
| Echocardiography performed, yes/no     | 0.002    | All              | Yes       |
| Creatinine maximum level               | 0.003    | 1308             | Yes       |
| Male sex, yes/no                       | 0.004    | All              | Yes       |
| COPD                                   | 0,006    | All              | Yes       |
| CKD                                    | 0.008    | All              | Yes       |
| Total cholesterole                     | 0.010    | 649              | No        |
| O2 content (arterial blood gas)        | 0.021    | 177              | No        |
| Periferal arterial disease             | 0,021    | All              | Yes       |
| pO2 (arterial blood gas)               | 0.022    | 192              | No        |
| Known atrial fibrillation, yes/no      | 0,024    | All              | Yes       |
| Known heart failure, yes/no            | <0.001   | All              | Yes       |

CT – computer thomography, MI – myocardial infarction, cTn – cardiac troponin, CRP – C-reactive protein, TIA – transorient ischemic attack, COPD chronic obstructive pulmonary disease, CKD – chronic kidney disease, pO2 – arterial oxygen partial pressure. \* other symptoms than chest pain, dyspnea or palpitations.

**Supplementary table 2.** Comparison in distinguishing type 1 MI between the initial two reviewers (K: 0.61; overall agreement: 82.6%).

| 1st Reviewer | 2nd Reviewer |       |       |
|--------------|--------------|-------|-------|
|              | MI type 1    | Other | Total |
| MI type 1    | 761          | 126   | 887   |
| Other        | 105          | 336   | 441   |
| Total        | 866          | 462   | 1328  |

**Supplementary table 3.** Comparison between the initial two reviewers in distinguishing type 2 MI (K: 0.54; overall agreement: 85.8%).

| 1st Reviewer | 2nd Reviewer |       |       |
|--------------|--------------|-------|-------|
|              | MI type 2    | Other | Total |
| MI type 2    | 158          | 87    | 245   |
| Other        | 101          | 982   | 1083  |
| Total        | 259          | 1069  | 1328  |

**Supplementary table 4.** Comparison between the initial two reviewers in distinguishing multifactorial myocardial injury (K: 0.48; overall agreement: 88.5%).

| 1st Reviewer   | 2nd Reviewer   |       |       |
|----------------|----------------|-------|-------|
|                | Multifactorial | Other | Total |
| Multifactorial | 91             | 68    | 159   |
| Other          | 85             | 1084  | 1189  |
| Total          | 176            | 1152  | 1328  |

**Supplementary table 5.** Stratified Kappa analysis of the variables associated with agreement or disagreement in figure 4.

| Variable                               | n    | % agreement | kappa (95% CI)   | Variable                               | n    | % agreement | Kappa (95% CI)   |
|----------------------------------------|------|-------------|------------------|----------------------------------------|------|-------------|------------------|
| Active smoker                          | 214  | 86.9        | 0.61 (0.49-0.73) | Non-smoker                             | 1114 | 75.0        | 0.54 (0.49-0.58) |
| STEMI                                  | 398  | 89.9        | 0.29 (0.15-0.43) | No STEMI                               | 930  | 71.4        | 0.53 (0.48-0.57) |
| Coronary angiography performed         | 771  | 86.5        | 0.53 (0.45-0.61) | Coronary angiography not performed     | 557  | 63.7        | 0.45 (0.39-0.51) |
| No dyspnea                             | 1050 | 80.2        | 0.57 (0.52-0.62) | Dyspnea                                | 278  | 64.7        | 0.44 (0.36-0.53) |
| Troponin > median (3.1227)             | 650  | 82.6        | 0.60 (0.54-0.67) | Troponin dynamics ≤ median (3.1227)    | 649  | 72.4        | 0.51 (0.45-0.56) |
| Systolic blood pressure ≤ median (145) | 641  | 78.2        | 0.59 (0.54-0.65) | Systolic blood pressure > median (145) | 620  | 76.1        | 0.50 (0.44-0.57) |
| CRP on admission ≤ median (5)          | 670  | 83.1        | 0.58 (0.50-0.64) | CRP on admission > median (5)          | 613  | 71.1        | 0.52 (0.46-0.57) |
| No history of stroke or TIA            | 1142 | 79.2        | 0.58 (0.54-0.62) | History of stroke or TIA               | 186  | 63.4        | 0.39 (0.28-0.49) |

STEMI – ST-elevation myocardial infarction, CRP – C-reactive protein, TIA – transient ischemic attack.
